1 **Bacteriophage adaptation to a mammalian mucosa reveals a trans-domain**  
2 **evolutionary axis**

3

4 Wai Hoe Chin<sup>1</sup>, Ciaren Kett<sup>1</sup>, Oren Cooper<sup>2</sup>, Deike Müseler<sup>3</sup>, Yaqi Zhang<sup>3</sup>, Rebecca  
5 Bamert<sup>4</sup>, Ruzeen Patwa<sup>1</sup>, Laura C. Woods<sup>1</sup>, Citsabehsan Devendran<sup>3</sup>, Joe Tiralongo<sup>2</sup>,  
6 Trevor Lithgow<sup>4</sup>, Mike J. McDonald<sup>1</sup>, Adrian Neild<sup>3</sup> and Jeremy J. Barr<sup>1</sup>

7

8 <sup>1</sup> School of Biological Sciences, Monash University, VIC, 3800, Australia

9 <sup>2</sup> Institute for Glycomics, Griffith University, Gold Coast Campus, QLD, 4222, Australia

10 <sup>3</sup> Department of Mechanical and Aerospace Engineering, Monash University, VIC, 3800,  
11 Australia

12 <sup>4</sup> Infection and Immunity Program and Department of Microbiology, Monash Biomedicine  
13 Discovery Institute, Monash University, VIC, 3800, Australia

14 **Abstract**

15 The majority of viruses within the human gut are obligate bacterial viruses known as  
16 bacteriophages (phages)<sup>1</sup>. Their bacteriotropism underscores the study of phage  
17 ecology in the gut, where they sustain top-down control<sup>2-4</sup> and co-evolve<sup>5</sup> with gut  
18 bacterial communities. Traditionally, these were investigated empirically via *in vitro*  
19 experimental evolution<sup>6-8</sup> and more recently, *in vivo* models were adopted to account  
20 for gut niche effects<sup>4,9</sup>. Here, we probed beyond conventional phage-bacteria co-  
21 evolution to investigate the potential evolutionary interactions between phages and  
22 the mammalian “host”. To capture the role of the mammalian host, we recapitulated a  
23 life-like mammalian gut mucosa using *in vitro* lab-on-a-chip devices (to wit, the gut-on-  
24 a-chip) and showed that the mucosal environment supports stable phage-bacteria co-  
25 existence. Next, we experimentally evolved phage populations within the gut-on-a-  
26 chip devices and discovered that phages adapt by *de novo* mutations and genetic  
27 recombination. We found that a single mutation in the phage capsid protein Hoc –  
28 known to facilitate phage adherence to mucus<sup>10</sup> – caused altered phage binding to  
29 fucosylated mucin glycans. We demonstrated that the altered glycan-binding  
30 phenotype provided the evolved mutant phage a competitive fitness advantage over  
31 their ancestral wildtype phage in the gut-on-a-chip mucosal environment. Collectively,  
32 our findings revealed that phages – in addition to their evolutionary relationship with  
33 bacteria – are also able to engage in evolution with the mammalian host.

## 34 **Introduction**

35 Bacteriophages (phages) are viruses that predate bacteria to replicate. Their  
36 bacteriotropism is reflected by the manifold of studies on phage-bacteria antagonistic  
37 co-evolution<sup>6-8,11</sup>. In the mammalian gut, this antagonistic co-evolutionary dynamic is  
38 key in maintaining long-term phage-microbiome homeostasis and diversity<sup>9,12</sup>. While  
39 extremely insightful, this phage-to-bacteria focus has overlooked another potential  
40 trans-domain evolution: the phage-mammalian axis. Phages have been demonstrated  
41 to adhere directly to mammalian mucin<sup>10</sup>, and when applied to mucosal layers, phages  
42 can exhibit enhanced virulence towards bacterial hosts<sup>13-16</sup>. At an ecological level, the  
43 gut mucosa segregates phage and bacterial populations, establishing spatial refuges,  
44 which can promote phage-bacteria co-existence<sup>17</sup>. We reasoned that the direct  
45 interaction between phages and the gut mucosa could have far-reaching implications  
46 for phage persistence, ecology, and evolution. We hypothesised that phages not only  
47 engage in antagonistic co-evolution with their bacterial hosts<sup>6</sup>, but also evolve in  
48 response to their mammalian host or mammalian-derived factors. Using an *in vitro* lab-  
49 on-chip device to simulate a life-like mammalian mucosal layer<sup>18</sup>, we tested if phage  
50 evolution would favour phenotypes that persist within the mammalian mucosal  
51 environment.

52 **The gut-on-a-chip supports phage-bacteria co-existence within a mucosal layer.**

53 To investigate the capacity of phages to adapt to the mammalian mucosal  
54 environment, we fabricated a simple gut-on-a-chip microfluidic device that  
55 recapitulates key features of the mammalian gut mucosa (Fig.1A). These devices are  
56 experimentally amenable, provide an accessible platform for biological replication, and  
57 recapitulate essential organ-level functions of the gut<sup>18,19</sup> (Fig.1B). Our gut-on-a-chip  
58 consisted of a single channel containing a confluent colonic cell layer, capable of  
59 mucus secretion and exhibiting mucus turnover (Fig.1C, Supplementary Fig.1A). The  
60 gut-on-a-chip was able to support stable phage-bacteria co-existence for up to 24  
61 hours. In each device, *Escherichia coli* bacteria and T4 phages were infused and the  
62 co-culture was maintained for 24 hours under constant perfusion with sterile media.  
63 To assess microbial population dynamics, an automated sample collection system  
64 was developed where egressing samples from the device were heat-inactivated,  
65 followed by collection at 30-minute intervals, with phages and bacteria subsequently  
66 quantified via quantitative PCR (qPCR) (Fig.1E, Supplementary Fig.1B). Here, phage  
67 numbers increased rapidly within two hours post-inoculation with a concomitant crash  
68 in the bacterial population. Following this crash, the phage population stabilised  
69 between  $10^6$  –  $10^7$  phage/ml whilst maintaining suppression of the bacterial  
70 population, particularly over the first 10 hours. Subsequently, bacterial levels rose  
71 above qPCR detection thresholds, exhibiting classical prey-predator dynamics,  
72 characterised by cyclic changes in phage-bacterial numbers<sup>20</sup>. There was  
73 considerable variation between replicate devices in both phage-bacteria population  
74 abundances and dynamics, suggesting that each device was delineated by inherent  
75 fluctuations and ecological stochasticity. This was exemplified in one replicate (Fig.1E,  
76 replicate 1) where the bacterial population remained suppressed below qPCR

77 detection threshold while the remaining replicates (Fig.1E, replicates 2 and 3)  
78 exhibited detectable but disparate phage-bacterial population dynamics overtime.  
79 Overall, the gut-on-a-chip provided a tripartite model system that supported  
80 mammalian, bacterial and phage co-culture.

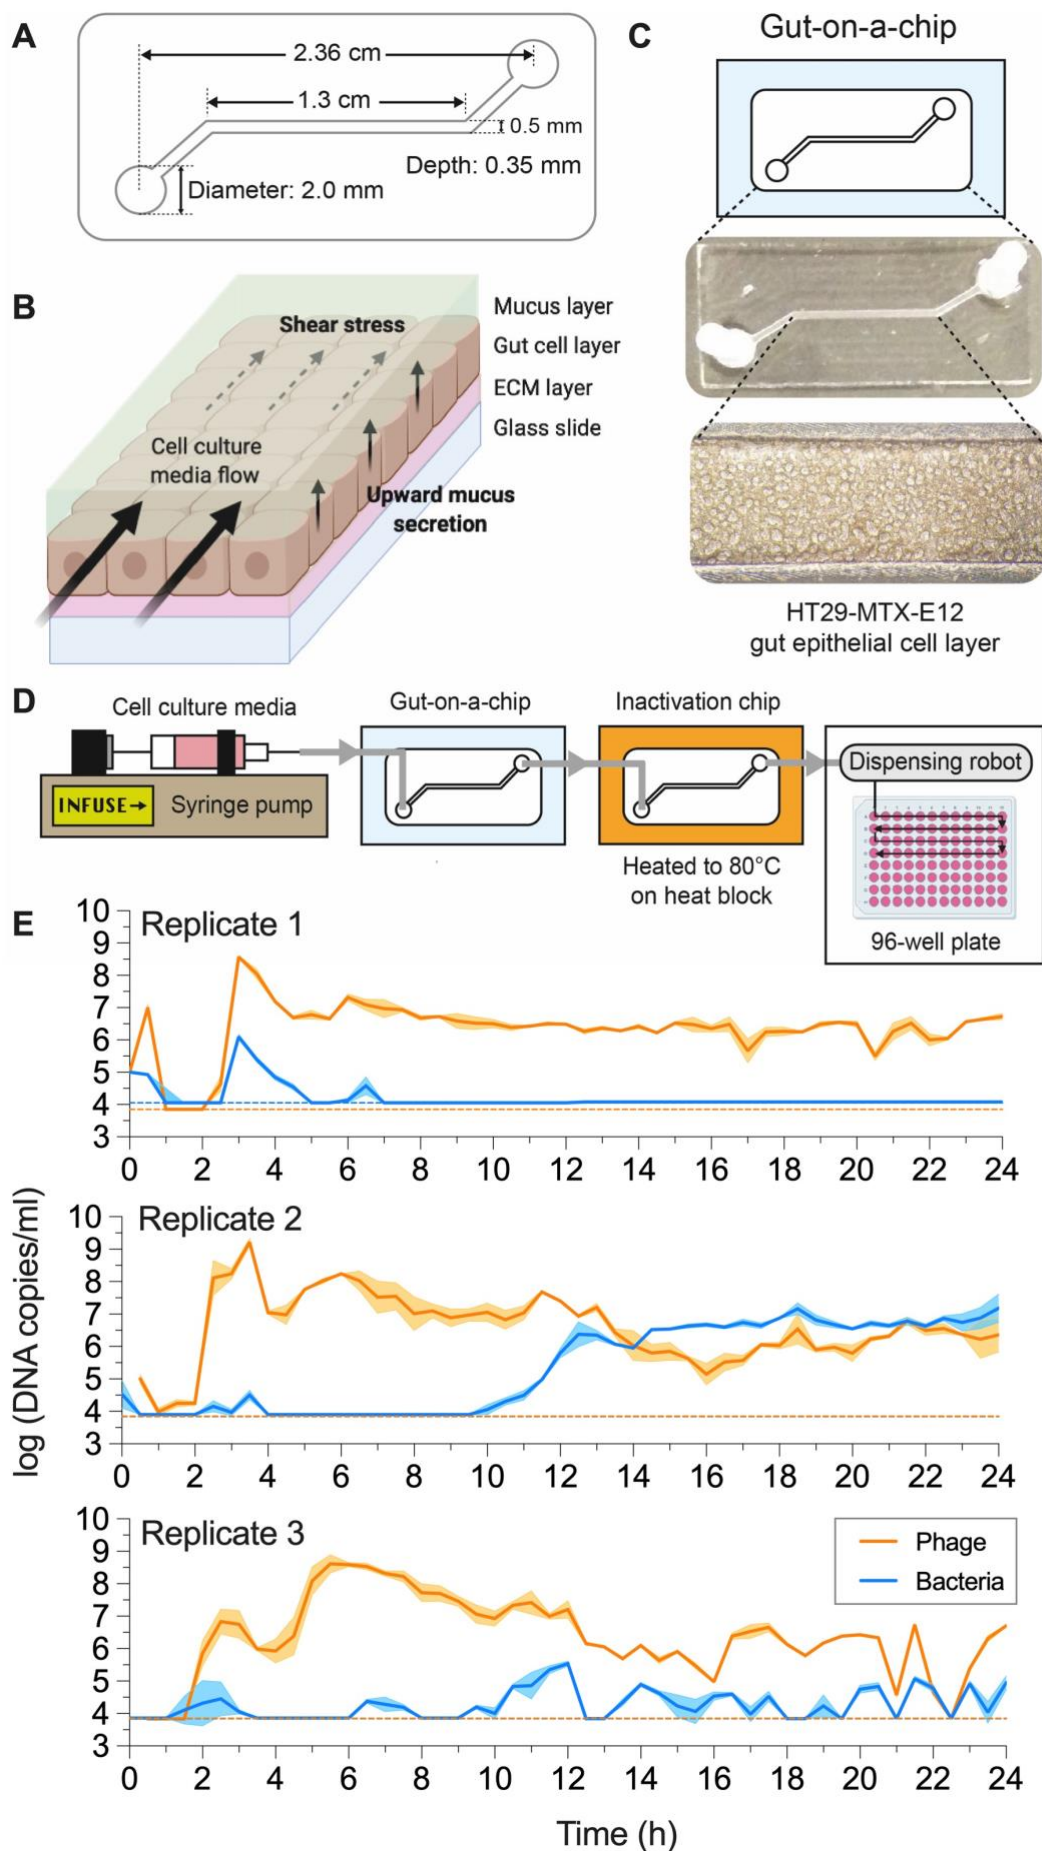

82 **Fig.1 The gut-on-a-chip mucus environment supports phage-bacteria co-existence.** A)  
83 Schematic and channel dimension of the gut-on-a-chip. B) Mucus turnover dynamics from the  
84 device is driven by shear stress from fluid flow and upward mucus secretion from the epithelial  
85 layer. C) HT29-MTX-E12 cell line grows and differentiates within the device channel  
86 environment to produce a mucus layer at ~72 hours post-seeding. D) Schematic for overall  
87 gut-on-a-chip set-up for chip perfusion, continuous sample inactivation via heat and  
88 automated sample collection for qPCR quantification. E) qPCR-quantified phage-bacteria  
89 population in three separate devices at 30-minute intervals over 24 hours. Plotted line and  
90 shaded region represents mean  $\pm$  SEM of three qPCR technical replicates ( $n = 3$ ) per  
91 experimental replicate ( $N = 3$ ). Orange and blue dotted lines represent the qPCR limit of  
92 detection threshold for phage and bacteria respectively, per biological replicate.

93 **The mammalian mucus layer influences phage evolution.** We performed  
94 experimental evolution of phage populations within the mucosal environment of the  
95 gut-on-a-chip (Fig.2A). Gut-on-a-chip devices were inoculated with populations of T4  
96 phages and *E. coli* bacteria (the founding phage population herein referred to as the  
97 “ancestral” phage), which were maintained for 24 hours. We then conducted  
98 successive transfers of the evolved phage populations into fresh gut-on-a-chip devices  
99 grown from naïve gut cells and seeded with naïve bacterial populations (“naïve”  
100 referring to entities that had no prior exposure to phages). By limiting the transfers to  
101 the phage population only, we directed phage adaptation towards the mucosal  
102 environment, while limiting phage-bacterial co-evolution. In total, we performed five  
103 successive transfers of evolved phages across three biological replicates in gut-on-a-  
104 chip devices and in test-tubes; the latter as an experimental control lacking a  
105 mammalian mucosal environment. Phages and bacteria were consistently recovered  
106 from the gut-on-a-chip mucosal environments, demonstrating that the mucus layer  
107 supported phage propagation while maintaining a stable bacterial population over the  
108 course of the experimental evolution (Fig.2B, gut-on-a-chip). This contrasted with  
109 controls populations in test-tubes where bacteria were frequently extinct (Fig.2B, test-  
110 tube).

111  
112 Next, we sought to determine the evolutionary changes that occurred in the phage  
113 populations between gut-on-a-chip and test-tubes using whole-genome sequencing,  
114 followed by read alignment and mutational calling. We discovered background  
115 mutations comprising of single nucleotide polymorphisms (SNPs) and single-  
116 nucleotide insertions in our ancestral phage population, reflective of their long-term  
117 laboratory storage and genetic drift<sup>21</sup> (Supplementary table 1A). We subtracted these



118 background SNPs and insertions from our mutational readouts in order to highlight *de*  
119 *novo* mutations in our gut-on-a-chip and test-tube phage populations.

120

121 In the case of our gut-on-a-chip populations, *de novo* mutations were found in genes  
122 encoding nucleotide binding and metabolism proteins, structural proteins and  
123 hypothetical proteins, most of which were transient and low abundance  
124 (Supplementary Table 1B). While we did not observe parallel evolution across our  
125 chip-evolved populations, two mutations attained high-abundance within the first  
126 replicate population. The first was a non-synonymous SNP within the *hoc* (highly  
127 immunogenic outer capsid) gene, which encodes for an accessory outer capsid  
128 protein that has been demonstrated to facilitate phage adherence to mucus<sup>10</sup>. This  
129 SNP resulted in an amino acid change at position 246 from aspartic acid to asparagine  
130 (henceforth referred to as D246N Hoc). The second was an in-frame 21bp-deletion  
131 ( $\Delta$ 21bp) of the *goF* gene which encodes for a transcription antitermination factor that  
132 antagonises the bacterial  $\rho$  (Rho) termination factor from prematurely degrading  
133 phage mRNA transcripts (Supplementary Fig.2A & 2B)<sup>22</sup>. At their peak frequencies in  
134 the fourth transfer, both  $\Delta$ 21bp *goF* and D246N Hoc mutations achieved 72% and  
135 83.3% of the population respectively, indicating a strong selective advantage for these  
136 mutations within the gut-on-a-chip (Fig.2C, gut-on-a-chip replicate 1).

137

138 By contrast, phages evolving in test-tubes exhibited arms-race-like dynamics with their  
139 bacterial hosts; meaning that mutations found were largely directed towards  
140 adaptation for bacterial infection<sup>6,11</sup>. The phages evolved in test-tubes exhibited *de*  
141 *novo* mutations in *gp37*, which encodes the distal subunit of the phage long tail fibre  
142 responsible for phage adsorption onto its bacterial hosts. These mutations were

143 observed transiently and at low-frequency across all test-tube replicate populations  
144 (Fig.2C, test-tube replicates; Supplementary Table 1A). We also observed other  
145 mutations affecting phage baseplate-associated genes (*gp6* and *gp9*), whose gene  
146 products facilitate genome injection into the bacterial host during infection; although  
147 these mutations were only present in one replicate (Fig.2C, test-tube replicate 3).  
148 Despite the disparate *de novo* mutation profiles between gut-on-a-chip and test-tube  
149 populations, we did not observe significant differences in total number of *de novo*  
150 mutations across the five transfers between the gut-on-a-chip ( $6.3 \pm 0.9$  mutations)  
151 and test-tube phage populations ( $7.0 \pm 2.1$  mutations) (Fig.2D).

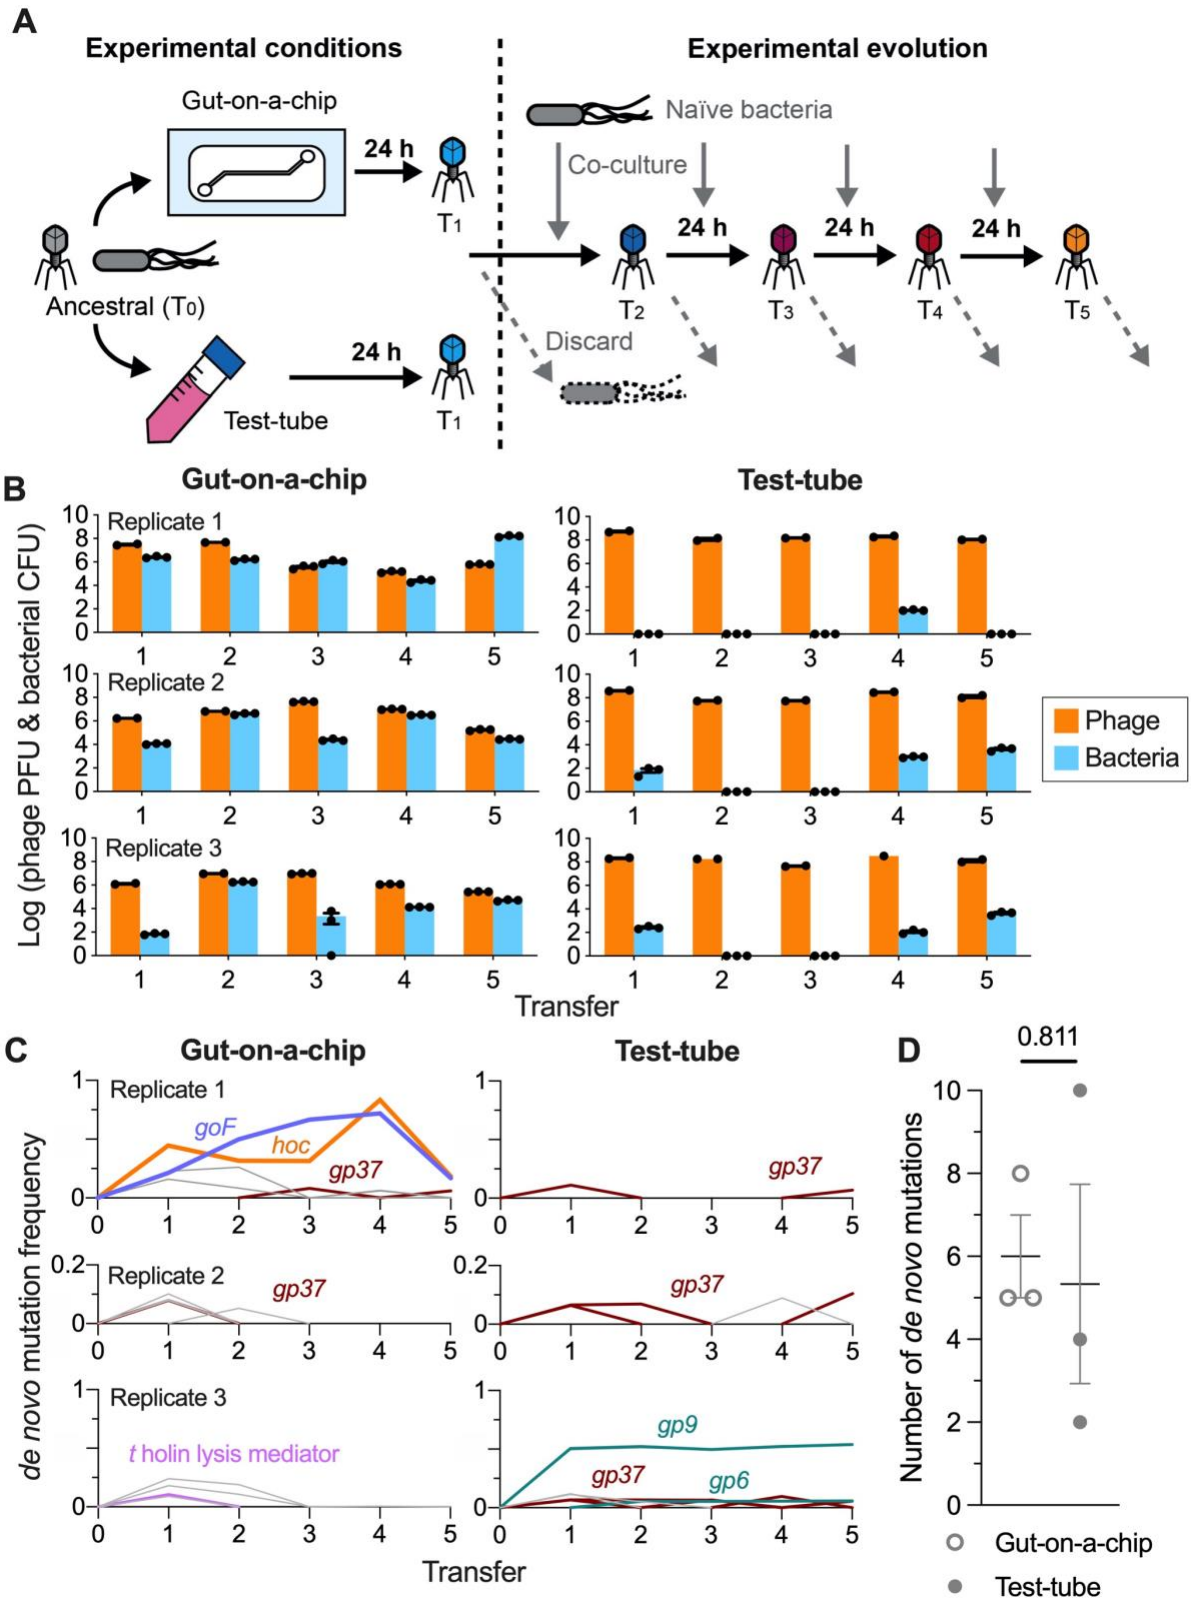

152

153 **Fig.2 Phages evolve in response to the life-like mammalian mucus layer in the gut-on-**

154 **a-chip.** A) Ancestral (zeroth transfer;  $T_0$ ) T4 phage and *E. coli* bacterial hosts were inoculated

155 into three gut-on-a-chip and test-tube set-ups, respectively. The co-cultures were incubated

156 for 24 hours with phages subsequently harvested for the first transfer ( $T_1$ ). Phages from  $T_1$   
157 were transferred onto fresh chips and test-tubes seeded with naïve *E. coli* B hosts and the  
158 process was repeated till the fifth transfer ( $T_5$ ). B) Population of phages and bacteria from the  
159 mucus sample at the end of each 24-hour passage in chip and test-tube replicates. C)  
160 Frequency of *de novo* mutations emerging from the phage population over five transfers from  
161 the gut-on-a-chip and test-tube set-ups. Coloured line represents the mutations: D246N *hoc*  
162 mutation in orange,  $\Delta 21$ bp *goF* mutation in purple, *gp37* (distal subunit phage long tail fibre)  
163 in brown, *t* holin lysis mediator in pink, and *gp6* and *gp9* (phage baseplate subunits) in teal.  
164 Grey lines represent other transient and low-frequency *de novo* mutations (see  
165 Supplementary table 1B). D) Average number of *de novo* mutations from phage populations  
166 evolved in gut-on-a-chip and test-tube conditions. Data points in panels B were technical  
167 replicates for phage-bacteria quantification from transfers, while datapoints in D were  
168 independent experimental replicates with values plotted as mean  $\pm$  SEM across the  
169 experimental replicates ( $N = 3$ ). P-value in panel D was derived from a two-tailed unpaired t-  
170 test.

171 **High multiplicity-of-infection is a driver for phage recombination.** In asexual  
172 populations such as with phages, genetic recombination is key to enhancing fitness  
173 by alleviating clonal interference and genetic hitch-hiking<sup>23,24</sup>. For lytic phages, such  
174 as T4, recombination occurs when multiple phage genotypes co-infect the same  
175 bacterial host, allowing allelic exchange between the phage genomes<sup>25</sup>. Since co-  
176 infections drive recombination, higher multiplicity-of-infections (MOIs) typically render  
177 higher recombination rates<sup>25</sup>. Crucially, high MOIs were sustained in our chip-evolved  
178 phage populations, where elevated phage-to-bacteria ratios were observed (Fig.1E &  
179 2B). We noted that the D246N *Hoc* and  $\Delta 21$ bp *goF* mutations follow similar frequency  
180 trajectories with their increase and decline between the fourth and fifth transfers  
181 (Fig.2C, test-tube replicate 1). Their intertwined trajectories surpassing 50%  
182 frequencies suggest that the mutations had recombined onto a shared genetic  
183 background to overcome clonal interference. We sought to verify if the high phage-to-  
184 bacteria ratios – and thus, high MOI – were drivers for recombination in lytic phage  
185 populations. We initiated one-step phage growth experiments at high and low MOIs  
186 (i.e. 10 and 0.1 respectively) with a 1:1 mix of two phage mutants: i) experimentally-  
187 derived  $\Delta 21$ bp *goF* mutant (gene position: 5842 – 6267) and ii) lab-stock *hoc* deletion  
188 mutant ( $\Delta hoc$ ; gene position: 110187 – 111317) (Fig.3A). By limiting the phages to a  
189 single growth step, we limit phage recombination within a single replicative cycle.  
190 Following PCR screening of individual plaques, we found that 44% of phage progeny  
191 were recombinants at high MOI conditions, with a bias towards wildtype recombinants  
192 (43/98 phages screened were recombinants; 31/43 of wildtype recombinants; Fig.3B,  
193 Supplementary Fig.3). Meanwhile, only 1 wildtype recombinant phage was detected  
194 from 98 isolates screened from low MOI conditions, i.e. ~1% recombinant frequency  
195 (Fig.3B, Supplementary Fig.3). The rapid emergence of recombinants within a single

196 phage replication cycle suggests that recombination is a key driving force for phage  
 197 evolution. Collectively, this suggests that a high and sustained phage-to-bacteria ratio  
 198 facilitates genetic recombination in phages, which in-turn promote selection of high-  
 199 frequency beneficial mutations and alleviation of clonal interference.  
 200

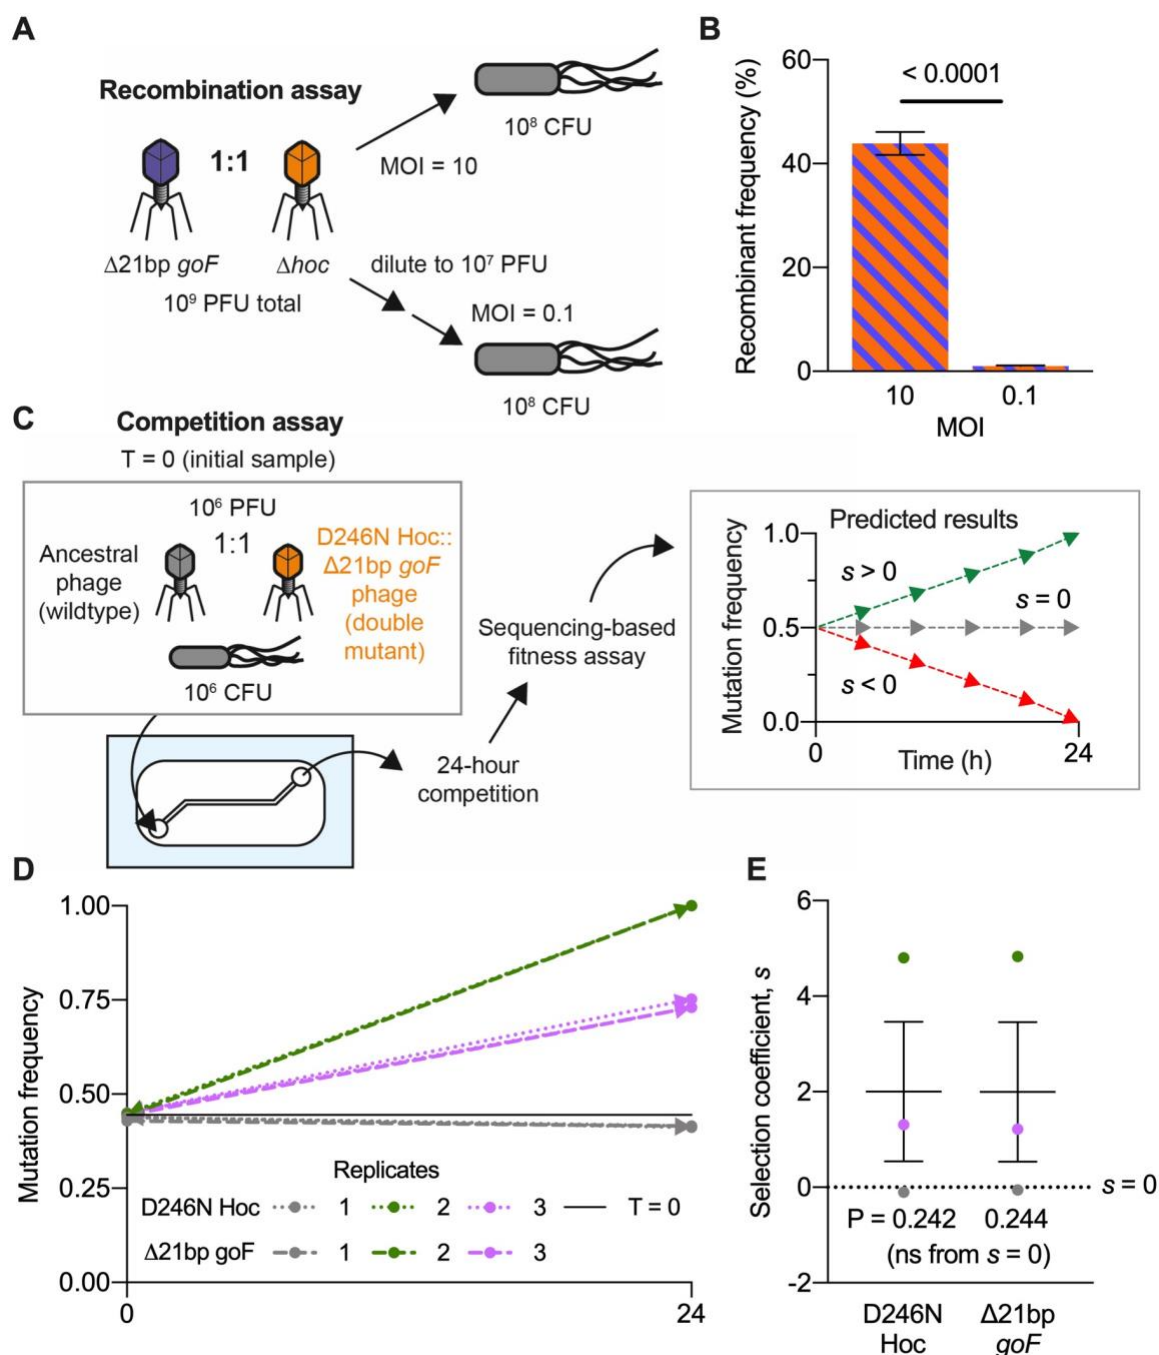

201

202 **Fig.3 Mucus layer supports phage recombination and selection of beneficial mutants.**

203 A) Gut-on-a-chip-evolved  $\Delta 21\text{bp } goF$  phage mutant was mixed at a 1:1 ratio with lab-derived  
204  $\Delta hoc$  mutant. Naïve *E. coli* were infected with the 1:1 phage mixture at MOIs 10 and 0.1  
205 following a one-step growth protocol to ensure that only a single round of viral replication could  
206 occur. B) Percentage frequency of phage recombinants from PCR screening for  $\Delta 21\text{bp } goF$ -  
207  $\Delta hoc$  or wildtype-reconstituted recombinants. 49 phage isolates ( $n = 49$ ) were screened per  
208 experimental replicate ( $N = 2$ ) leading to a total of 98 isolates screened per experimental  
209 condition (MOI 10 or 0.1) (Supplementary Fig.3). C) Competition experiment between D246N  
210 Hoc:: $\Delta 21\text{bp-}goF$  mutant phage with ancestral phage T4 in the gut-on-a-chip. Gut-on-a-chip  
211 seeded with naïve *E. coli* was inoculated with equal proportions of the respective phage  
212 genotypes. Chip effluents collected at timepoints  $T = 0$  and 24 hours were subjected to whole-  
213 genome sequencing to track D246N Hoc and  $\Delta 21\text{bp-}goF$  mutations after 24 hours of  
214 competition. Estimated selection coefficients could be positive ( $s > 0$ ), neutral ( $s = 0$ ) or  
215 negative ( $s < 0$ ). D) D246N Hoc and  $\Delta 21\text{bp } goF$  mutational frequencies measured from three  
216 independent gut-on-a-chip replicates ( $N = 3$ ) between  $T = 0$  and 24 hours. E) Plot of estimated  
217 mean selection coefficient for D246N Hoc and  $\Delta 21\text{bp } goF$  mutation in each experimental  
218 replicate ( $N = 3$ ). Black solid line in panel D represents the initial ( $T = 0$ ) average frequency of  
219 D246N Hoc mutation at 44.5% and  $\Delta 21\text{bp } goF$  mutation at 43.9%, across three replicates ( $N$   
220  $= 3$ ). Error bars in panel B and line with error bars in panel E represent mean  $\pm$  SEM across  
221 experimental replicates. P-values in panel B were derived from unpaired t-test between  
222 treatment conditions (MOI 10 and 0.1) and; in panel E, between coefficients D246N Hoc and  
223  $\Delta 21\text{bp } goF$  mutations against  $s = 0$  (no selection).

224 **Phage mutant outcompetes ancestor phage in mucus.** To assess the fitness of  
225 the evolved phage possessing the D246N Hoc and  $\Delta 21\text{bp}$  *goF* mutations, we  
226 competed the evolved double mutant phage against its ancestral counterpart in the  
227 gut-on-a-chip mucus environment. The double mutant phage was isolated and  
228 genotypically verified through Sanger sequencing. Competition between the double  
229 mutant and ancestral phage was initiated by inoculating both phages at a 1:1 ratio into  
230 a gut-on-a-chip, seeded with naïve bacterial host. The device effluent was sampled at  
231 0 and 24 hours, with samples subsequently whole-genome sequenced to track the  
232 D246N Hoc:: $\Delta 21\text{bp}$ -*goF* double mutant frequency over 24 hours of competition  
233 (Fig.3C). We verified that our devices were accurately seeded with roughly equal  
234 proportions of mutant and wildtype phages as reflected by ~44% frequency of both the  
235 D246N Hoc and  $\Delta 21\text{bp}$  *goF* mutations at the initial experimental timepoint ( $t = 0$ )  
236 (Fig.3D). We observed the double mutant out-competed the wildtype phage in two of  
237 three replicate devices, eventually fixing in one of the replicate populations, while the  
238 remaining replicate showed no change from initial frequency (Fig.3D). To ascertain  
239 the strength of selection, we quantified the selection coefficients ( $s$ ) across the  
240 replicate populations with coefficients being either positive ( $s > 0$ ), neutral ( $s = 0$ ) or  
241 negative ( $s < 0$ ) (Fig.3C, Supplementary table 2). Overall, we found positive selection  
242 with  $s = 2$  on average, for both D246N Hoc and  $\Delta 21\text{bp}$  *goF* genotypes within the mucus  
243 environment, although significance from null selection i.e.  $s = 0$ , was not attained due  
244 to significant variability between replicate measurements (Fig.3E, Supplementary  
245 table 2; coefficients reported as mean  $\pm$  SEM with P-values derived from unpaired t-  
246 test).



247 **Hoc mutation alters phage mucus-adherence phenotype.** Phage adherence to  
248 mucus has been described as a mechanism that facilitates phage enrichment and  
249 persistence within the mammalian mucosal layers<sup>10</sup>. For T4 phage, this adherence  
250 phenotype is facilitated by the outer capsid protein Hoc, which has three externally-  
251 displayed immunoglobulin (Ig)-like domains and a highly-conserved fourth C-terminal  
252 capsid-binding domain<sup>26,27</sup>. The D246N Hoc mutation removes an acidic residue  
253 (aspartic acid) and replaces it with a neutral residue (asparagine). This mutation is  
254 located within the third Ig-like domain, potentially altering Hoc binding affinity to mucin  
255 glycans (Fig.4A). To test for altered glycan adherence, we fluorescently labelled whole  
256 phage particles of wildtype Hoc, D246N Hoc, and  $\Delta hoc$  genotypes, and assayed for  
257 glycan binding on a microarray printed with 153 unique glycan structures  
258 (Supplementary Table 3). Binding was measured as fold-changes relative to the array  
259 background signal and verified for P-value significance. Overall, we were able to  
260 observe binding of whole phages across seven glycan families. D246N Hoc phages  
261 generally exhibited altered glycan-binding compared to wildtype phage, while  $\Delta hoc$   
262 phages had lower overall fold-change intensities relative to wildtype and D246N Hoc  
263 phages (Fig.4B, whole phages). To further investigate the specificity of Hoc-glycan  
264 interactions, we recombinantly-expressed wildtype and D246N Hoc proteins  
265 (Supplementary Fig.4) and tested the proteins on the glycan array. We showed that  
266 the Hoc protein-glycan binding largely matched whole phage binding results (Fig.4B,  
267 recombinant Hoc protein). Next, surface plasmon resonance (SPR) was adopted to  
268 quantify the binding strength between glycans and surface-immobilised Hoc protein.  
269 We focused on a subset of 26 glycans that were amenable for SPR measurements  
270 taken in solution under flow (see Supplementary Table 3 for full glycan array analysis).  
271 The SPR data demonstrated that both wildtype and D246N Hoc-glycan binding was

272 specific for interactions with the same subset of fucosylated glycans (Fig.4B, Hoc-  
273 glycan SPR). Furthermore, the D246N Hoc protein had higher dissociation values  
274 ( $K_D$ ), indicating weaker binding to the subset of fucosylated glycans than the wildtype  
275 Hoc (Fig.4B, Hoc-glycan SPR; Supplementary Fig.5). Fucosylated mucin glycans are  
276 ubiquitous along the human gastrointestinal tract in individuals possessing a functional  
277 copy of the  $\alpha$ -1,2-fucosyltransferase (*FUT2*) gene (known as “secretors”)<sup>28</sup>. Our gut-  
278 on-a-chip HT29-MTX-E12 cell line possesses *FUT2* and is capable of producing a  
279 fucosylated mucus layer in-line with the “secretor” phenotype<sup>29</sup>. Collectively, our  
280 results revealing Hoc-specific binding to fucosylated glycans, coupled with changes in  
281 glycan-binding affinity, indicate a direct adaptation of T4 phage to the gut-on-a-chip  
282 mucus layer.

283

284 With this knowledge, we proceeded to validate the glycan-binding phenotype of  
285 D246N Hoc within the mucosal environment. We tested this by competing the D246N  
286 Hoc phage against the wildtype Hoc phage in a phage retention and washout assay  
287 within the gut-on-a-chip, under the presence of either a fucosylated (Lacto-N-  
288 fucopentaose I [7A]) or non-fucosylated ( $\alpha$ -1,6-mannobiose [5F]) glycan. We initiated  
289 the experiment by infusing three replicate devices, each with a 1:1 ratio of wildtype  
290 Hoc and D246N Hoc phages suspended in fucosylated or non-fucosylated glycan  
291 solutions, followed by washout of the phages in the same glycan solutions (Fig.4C).  
292 We posit that the wildtype Hoc phage, possessing higher affinity to dissolved  
293 fucosylated glycans, will be sequestered away from the mucus layer during the initial  
294 infusion, while D246N Hoc phage, with its lower affinity to fucosylated glycans, will be  
295 selectively retained in the mucus. Consequently, during the washout we expect higher  
296 recovery of D246N Hoc phage for extended periods over the wildtype Hoc phage. To

297 allow for subtractive plating, we utilised a wildtype Hoc phage possessing amber  
298 mutations on genes *43* and *44* (herein known as T4 am~~43/44~~) that was permissive  
299 only to *E. coli* strain SupE, while the D246N Hoc phage was permissive on both *E. coli*  
300 strains B and SupE. Our results show that in the presence of the fucosylated glycan  
301 Lacto-N-fucopentaose I [7A], D246N Hoc phage was recovered at higher levels in the  
302 first 2 hours of washout and remained detectable up to 4 hours, whereas wildtype Hoc  
303 phage was eliminated by ~3 hours (Fig.4D, Supplementary Fig. 5). Conversely, we  
304 observed no difference between D246N Hoc and wildtype Hoc phage washout in the  
305 presence of a control non-fucosylated glycan,  $\alpha$ -1,6-mannobiose [5F], where both  
306 phages persisted up to the 4-hour final timepoint (Fig.4E, Supplementary Fig. 5).  
307 Overall, we were able to elucidate and verify the phenotypic effect of the D246N Hoc  
308 with fucosylated glycans (as predicted via SPR) within the gut-on-a-chip mucosal  
309 environment.

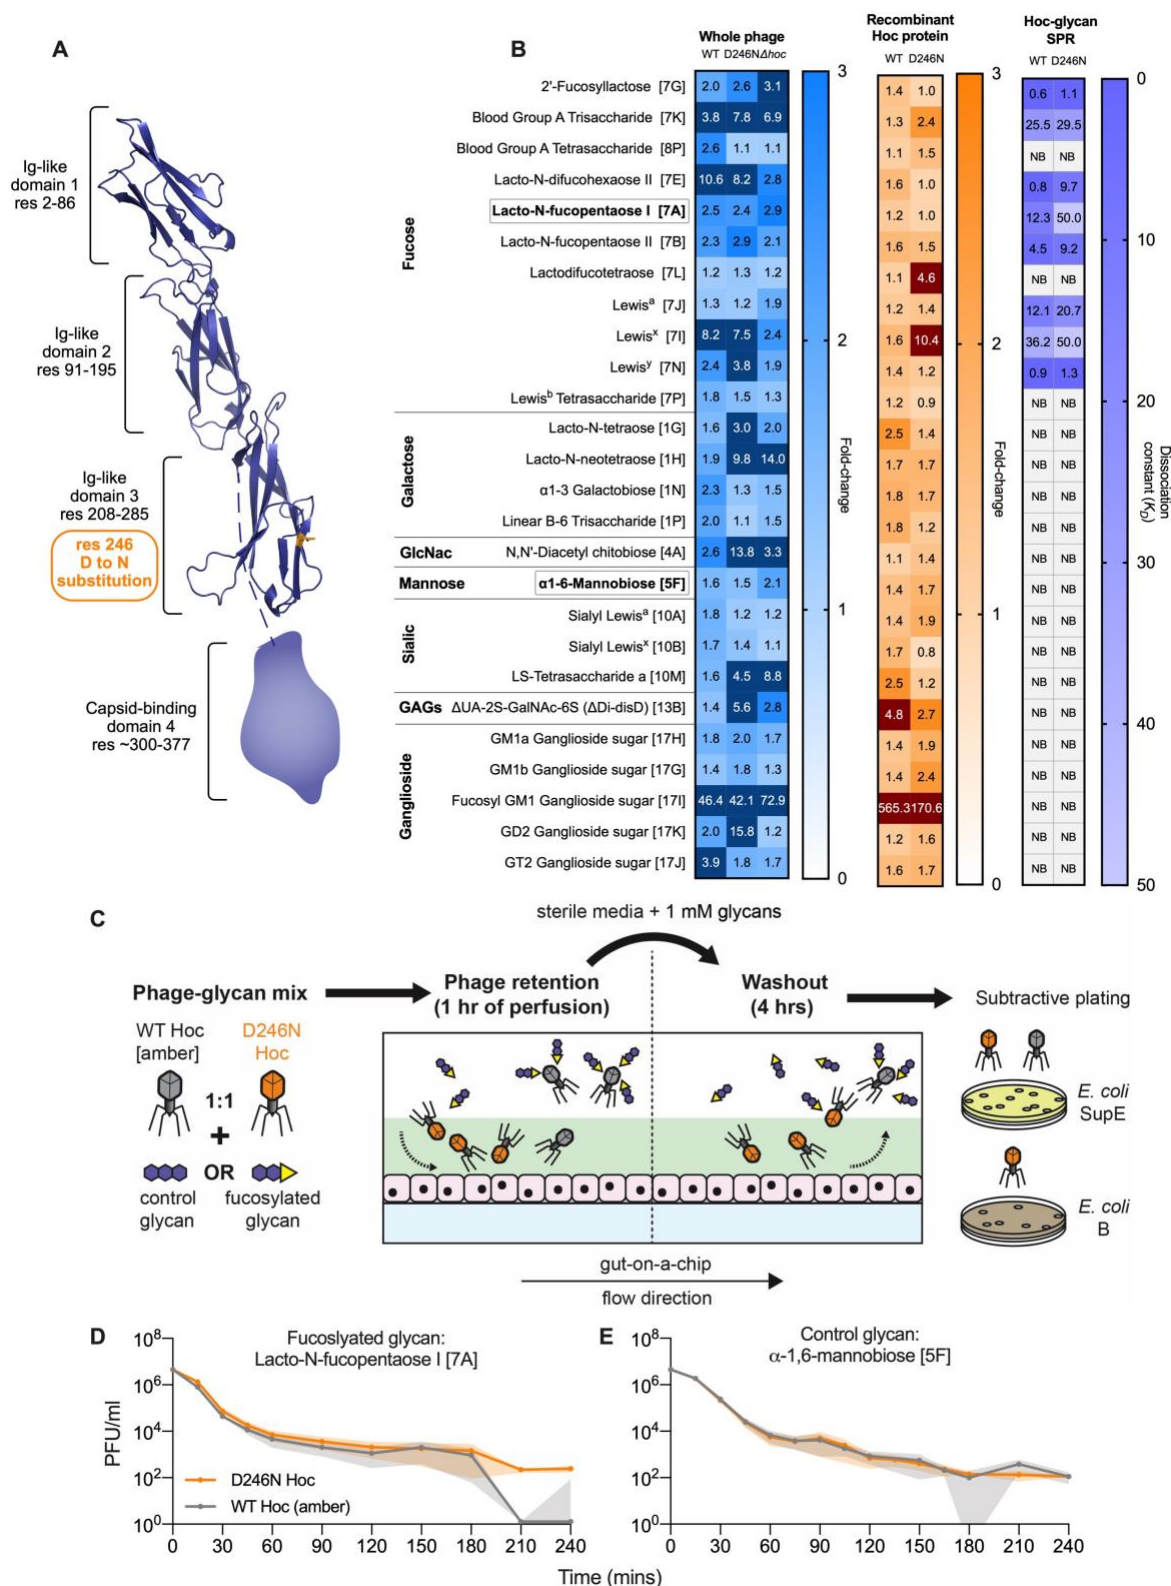

310

311 **Fig.4: Phage evolved in mammalian mucus layer exhibit altered mucus adherence**

312 **phenotype.** A) T4 Hoc protein structure model demonstrating the position of D246N mutation

313 within the third Ig-like domain, highlighted in orange. The capsid-binding fourth domain was

314 not modelled due to the lack of structural homologues in Protein Data Bank (PDB). B)  
315 Normalised fold-change fluorescence intensities of 26 top glycan array hits (glycan ID  
316 corresponding to Supplementary Table 3 as indicated in square brackets) of labelled,  
317 ultrapurified whole phages: wildtype [WT], D246N and  $\Delta hoc$  – blue heatmap; and  
318 recombinantly expressed Hoc proteins: WT and D246N – orange heatmap; followed by SPR  
319 assessing glycan-to-Hoc protein binding strength – purple heatmap. Numerical values in  
320 glycan array heatmaps represent fold-change magnitude normalised against background  
321 fluorescence where dark-colour panels indicate high fold-change values that were out-of-  
322 bounds from heatmap gradient. Numerical values in SPR heatmap represent dissociation  
323 constant ( $K_D$ ) values where higher  $K_D$  values indicate lower binding affinity. “NB” in SPR  
324 heatmap indicates no binding event. Encircled and bolded glycans 7A (Lacto-N-fucopentaose  
325 I) and 5F ( $\alpha$ -1,6-mannobiose) represent the glycans selected for phage retention and washout  
326 experiments in panels D and E. C) Experimental set-up for phage retention and washout from  
327 the gut-on-a-chip, where equal proportions of WT Hoc (with *am43/44* mutation) and D246N  
328 Hoc phages in 1 mM glycan solutions were perfused in the gut-on-a-chip for an hour during  
329 the retention phase. Subsequently, sterile media supplemented with 1 mM glycan, was  
330 perfused for 4 hours to initiate phage washout from the mucus layer. Washouts were collected  
331 at set time intervals and phages were quantified via subtractive plating on *E. coli* SupE  
332 (permissive for both WT Hoc [*am43/44*] and D246N Hoc) and *E. coli* B (only permissive for  
333 D246N Hoc). D) Washout of wildtype Hoc and D246N Hoc phages from the gut-on-a-chip  
334 under flow with 1 mM of fucosylated glycan 7A (Lacto-N-fucopentaose I) or E) control glycan  
335 5F ( $\alpha$ -1,6-mannobiose) over 4 hours. Lines in panels D and E were plotted as mean values  
336 with shaded regions representing the standard error of three biological (i.e. chip) replicates  
337 per timepoint (N = 3).

## 338 Discussion

339 Phages are largely considered inert with respect to the mammalian “host” and chiefly  
340 respond to antagonistic selection from their immediate replicative bacterial hosts.  
341 However, the mammalian milieu – in this case, the gut mucosa – is also a complex  
342 environment that can impose additional selection pressures such as mucus turnover  
343 dynamics and glycosylation that act on both bacterial and viral entities<sup>28,30,31</sup>. Here, we  
344 demonstrated that phages evolve in response to a dynamic mammalian gut mucosal  
345 environment, revealing a trans-domain evolution along the phage-mammalian axis.  
346 Unlike phage-bacteria antagonistic co-evolution where selection is largely directed  
347 and predictable (Fig.2C, test-tube), selection imparted by the mammalian mucosal  
348 environment is subtler as evidenced by variations in mutational profiles across  
349 evolving phage populations observed in individual gut-on-a-chip replicates (Fig.2C,  
350 gut-on-a-chip). The disparity observed in gut-on-a-chip population dynamics is  
351 reflective of interpersonal variations seen in gut viral community dynamics<sup>2,3</sup>. We  
352 speculate that stochastic ecological effects arising from demographic noise and gut  
353 spatial complexity<sup>32</sup>, could be key factors in determining mucosal selection within  
354 independent gut environments. Despite the mutational disparity and ecological  
355 variation between mucus-evolving phage populations, we acquired a genetically-  
356 recombined phage mutant exhibiting altered affinity towards fucosylated glycans  
357 (Fig.4C) via a mutation in the phage capsid’s mucus-adhering Hoc domain (Fig.4A).  
358 This mutation conferred a fitness advantage within the mucus layer by altering phage  
359 Hoc affinity to mucin glycans, specifically by decreasing Hoc affinity to fucosylated  
360 glycan structures (Fig.3E & 4B). While diminished phage glycan-binding may appear  
361 counterintuitive as a fitness advantage for persistence in the mucosal environment,  
362 we note that: i) the exact glycosylation profile and glycan abundance of the gut-on-a-

363 chip mucus layer were unknown and that, ii) our SPR screen was limited to a small  
364 subset of fucosylated glycans. Nonetheless, the mutation lent phages a detectable  
365 phenotypic response within the mucosal environment (Fig.4D & E); thus, validating  
366 the evolutionary interaction between the phage and the mammalian mucus layer.

367

368 Mucin fucosylation is widespread along the gastrointestinal tract of functional *FUT2*  
369 human genotypes (known as “secretors”), especially within the proximal and distal  
370 colon<sup>31</sup>. This suggests that the human host genotype and glycosylation demography  
371 directly influences gut phage biogeography at the inter- and intra-individual level,  
372 respectively. Moreover, the majority of the gut phageome possesses open reading  
373 frames for variable glycan-binding superfamily domains<sup>5,33</sup> suggesting that gut phages  
374 have immense adaptive freedom to respond and co-evolve with an individual’s unique  
375 mucosal glycosylation patterns to foster persistence<sup>10</sup>. Successful phage variants that  
376 emerge and persist in the gut to achieve high abundances will therefore, have greater  
377 capacities for genetic recombination to promote the fixation of beneficial mutations  
378 within the population. This subsequently dictates the phage populations that will reside  
379 and further engage in co-evolution with both the individual’s gut microbiome and gut  
380 environment. Alongside antagonistic co-evolution with gut bacteria, this novel  
381 symbiosis between the mammalian gut and phages might lend toward stable, long-  
382 term and highly personalised viromes and microbiomes, which are often recapitulated  
383 in human metagenomic cohort studies<sup>2,34</sup>. Overall, our findings may have far-reaching  
384 implications on re-evaluating phage evolution beyond antagonistic co-evolution with  
385 bacteria. In particular, we envisage future directions towards human host-centric  
386 intelligent phage design in synergy with host-directed phage evolution for highly  
387 personalised medicine and refined *in vivo* phage applications.

## 388 **Acknowledgements**

389 This work, including the efforts of J.J.B., was funded by the Australian Research  
390 Council (ARC) Discovery Early Career Researcher Award (DECRA) (DE170100525).

391 This work was performed in part at the Melbourne Centre for Nanofabrication (MCN)  
392 in the Victorian Node of the Australian National Fabrication Facility (ANFF).

393

## 394 **Author contributions**

395 Conceptualisation, resources and funding acquisition were carried out by J.J.B. The  
396 work was supervised by M.J.M, A.N. and J.J.B. Experimental design was carried out  
397 by W.H.C, M.J.M, A.N. and J.J.B. Evolution experiments (including phage purification,  
398 DNA isolation, extraction and bioinformatics), recombination assay, sequencing-  
399 based phage competition and competitive phage-glycan washout assay were  
400 conducted by W.H.C. Gut-on-a-chip fabrication, culture and set-up were performed by  
401 W.H.C, C.K. and C.D. with automated dispensing platform design and realisation by  
402 D.M. and Y.Z. High resolution phage sampling experiment was performed by W.H.C  
403 with qPCR quantification performed by C.K. Molecular cloning of recombinant Hoc  
404 protein expression strains was performed by R.P. and W.H.C. Recombinant Hoc  
405 protein expression, purification and modelling were performed by R.B. and T.L. Glycan  
406 array and SPR experiments with full data processing and analysis were performed by  
407 O.C. and J.T. Formal analysis of results were done by W.H.C, L.W., M.J.M. and J.J.B.  
408 The original draft was written by W.H.C. with subsequent reviews by M.J.M. and J.J.B  
409 and edits by W.H.C and J.J.B. All authors read and commented on the final draft of  
410 the manuscript.

411

412 **Competing interests** The authors declare no competing interests.



## 413 References

- 414 1. Breitbart, M. *et al.* Metagenomic analyses of an uncultured viral community  
415 from human feces. *J. Bacteriol.* **185**, 6220–6223 (2003).
- 416 2. Reyes, A. *et al.* Viruses in the faecal microbiota of monozygotic twins and their  
417 mothers. *Nature* **466**, 334–338 (2010).
- 418 3. Lim, E. S. *et al.* Early life dynamics of the human gut virome and bacterial  
419 microbiome in infants. *Nat. Med.* **21**, 1228–1234 (2015).
- 420 4. Reyes, A., Wu, M., McNulty, N. P., Rohwer, F. L. & Gordon, J. I. Gnotobiotic  
421 mouse model of phage-bacterial host dynamics in the human gut. *Proc. Natl.*  
422 *Acad. Sci. U. S. A.* **110**, 20236–20241 (2013).
- 423 5. Minot, S., Grunberg, S., Wu, G. D., Lewis, J. D. & Bushman, F. D.  
424 Hypervariable loci in the human gut virome. **109**, (2012).
- 425 6. Buckling, A. & Rainey, P. B. Antagonistic coevolution between a bacterium and  
426 a bacteriophage. *Proc. R. Soc. B Biol. Sci.* **269**, 931–936 (2002).
- 427 7. Hall, A. R., Scanlan, P. D. & Buckling, A. Bacteria-phage coevolution and the  
428 emergence of generalist pathogens. *Am. Nat.* **177**, 44–53 (2011).
- 429 8. Betts, A., Kaltz, O. & Hochberg, M. E. Contrasted coevolutionary dynamics  
430 between a bacterial pathogen and its bacteriophages. *Proc. Natl. Acad. Sci. U.*  
431 *S. A.* **111**, 11109–11114 (2014).
- 432 9. De Sordi, L., Khanna, V. & Debarbieux, L. The Gut Microbiota Facilitates Drifts  
433 in the Genetic Diversity and Infectivity of Bacterial Viruses. *Cell Host Microbe*  
434 **22**, 801-808.e3 (2017).
- 435 10. Barr, J. J. *et al.* Bacteriophage adhering to mucus provide a non-host-derived  
436 immunity. *Proc. Natl. Acad. Sci. U. S. A.* **110**, 10771–10776 (2013).
- 437 11. Paterson, S. *et al.* Antagonistic coevolution accelerates molecular evolution.

- 438 *Nature* **464**, 275–278 (2010).
- 439 12. De Sordi, L., Lourenço, M. & Debarbieux, L. ‘I will survive’: A tale of  
440 bacteriophage-bacteria coevolution in the gut. *Gut Microbes* **10**, 92–99 (2019).
- 441 13. Shan, J. *et al.* Bacteriophages are more virulent to bacteria with human cells  
442 than they are in bacterial culture; Insights from HT-29 cells. *Sci. Rep.* **8**, 5091  
443 (2018).
- 444 14. Almeida, G. M. F., Laanto, E., Ashrafi, R. & Sundberg, L. R. Bacteriophage  
445 adherence to mucus mediates preventive protection against pathogenic  
446 bacteria. *MBio* **10**, 1–12 (2019).
- 447 15. Green, S. I. *et al.* Targeting of Mammalian Glycans Enhances Phage  
448 Predation in the Gastrointestinal Tract. *MBio* **12**, (2021).
- 449 16. Barr, J. J. *et al.* Subdiffusive motion of bacteriophage in mucosal surfaces  
450 increases the frequency of bacterial encounters. *Proc. Natl. Acad. Sci. U. S. A.*  
451 **112**, 13675–13680 (2015).
- 452 17. Lourenço, M. *et al.* The Spatial Heterogeneity of the Gut Limits Predation and  
453 Fosters Coexistence of Bacteria and Bacteriophages. *Cell Host Microbe* **28**,  
454 390-401.e5 (2020).
- 455 18. Kim, H. J., Li, H., Collins, J. J. & Ingber, D. E. Contributions of microbiome and  
456 mechanical deformation to intestinal bacterial overgrowth and inflammation in  
457 a human gut-on-a-chip. *Proc. Natl. Acad. Sci. U. S. A.* **113**, E7–E15 (2016).
- 458 19. Jalili-Firoozinezhad, S. *et al.* A complex human gut microbiome cultured in an  
459 anaerobic intestine-on-a-chip. *Nat. Biomed. Eng.* **3**, 520–531 (2019).
- 460 20. Bohannan, B. J. M. & Lenski, R. E. Effect of prey heterogeneity on the  
461 response of a model food chain to resource enrichment. *Am. Nat.* **153**, 73–82  
462 (1999).

- 463 21. Subedi, D. & Barr, J. J. Temporal Stability and Genetic Diversity of 48-Year-  
464 Old T-Series Phages. *mSystems* **6**, (2021).
- 465 22. Sanson, B. & Uzan, M. *Sequence and characterization of the bacteriophage*  
466 *T4 comCa gene product, a possible transcription antitermination factor.*  
467 *Journal of Bacteriology* vol. 174 <http://jb.asm.org/> (1992).
- 468 23. Lang, G. I. *et al.* Pervasive genetic hitchhiking and clonal interference in forty  
469 evolving yeast populations. *Nature* **500**, 571–574 (2013).
- 470 24. McDonald, M. J., Rice, D. P. & Desai, M. M. Sex speeds adaptation by altering  
471 the dynamics of molecular evolution. *Nature* **531**, 233–236 (2016).
- 472 25. Mosig, G. The effect of multiplicity of infection on recombination values in  
473 bacteriophage T 4 D. *Z. Vererbungsl.* **93**, 280–286 (1962).
- 474 26. Sathaliyawala, T. *et al.* Functional analysis of the highly antigenic outer capsid  
475 protein, Hoc, a virus decoration protein from T4-like bacteriophages. *Mol.*  
476 *Microbiol.* **77**, 444–455 (2010).
- 477 27. Fokine, A. *et al.* Structure of the Three N-Terminal Immunoglobulin Domains of  
478 the Highly Immunogenic Outer Capsid Protein from a T4-Like Bacteriophage.  
479 *J. Virol.* **85**, 8141–8148 (2011).
- 480 28. Pickard, J. M. & Chervonsky, A. V. Intestinal Fucose as a Mediator of Host–  
481 Microbe Symbiosis. *J. Immunol.* **194**, 5588–5593 (2015).
- 482 29. Cairns, M. T. *et al.* Glycosylation-related gene expression in HT29-MTX-E12  
483 cells upon infection by *Helicobacter pylori*. *World J. Gastroenterol.* **23**, 6817–  
484 6832 (2017).
- 485 30. Gustafsson, J. K. *et al.* Dynamic changes in mucus thickness and ion secretion  
486 during *Citrobacter rodentium* infection and clearance. *PLoS One* **8**, (2013).
- 487 31. Kashyap, P. C. *et al.* Genetically dictated change in host mucus carbohydrate

- 488 landscape exerts a diet-dependent effect on the gut microbiota. *Proc. Natl.*  
489 *Acad. Sci. U. S. A.* **110**, 17059–17064 (2013).
- 490 32. Vellend, M. Conceptual synthesis in community ecology. *Q. Rev. Biol.* **85**,  
491 1689–1699 (2010).
- 492 33. Dutilh, B. E. *et al.* A highly abundant bacteriophage discovered in the unknown  
493 sequences of human faecal metagenomes. *Nat. Commun.* **5**, 1–11 (2014).
- 494 34. Shkoporov, A. N. *et al.* The Human Gut Virome Is Highly Diverse, Stable, and  
495 Individual Specific. *Cell Host Microbe* **26**, 527-541.e5 (2019).
- 496 35. Lee, C., Lee, S., Shin, S. G. & Hwang, S. Real-time PCR determination of  
497 rRNA gene copy number: Absolute and relative quantification assays with  
498 *Escherichia coli*. *Appl. Microbiol. Biotechnol.* **78**, 371–376 (2008).
- 499 36. Fittipaldi, M. *et al.* Discrimination of infectious bacteriophage T4 virus by  
500 propidium monoazide real-time PCR. *J. Virol. Methods* **168**, 228–232 (2010).
- 501 37. Bonilla, N. *et al.* Phage on tap-a quick and efficient protocol for the preparation  
502 of bacteriophage laboratory stocks. *PeerJ* **2016**, e2261 (2016).
- 503 38. Kelley, L. A., Mezulis, S., Yates, C. M., Wass, M. N. & Sternberg, M. J. The  
504 Phyre2 web portal for protein modeling, prediction and analysis. *Nat. Protoc.*  
505 **10**, 845–858 (2016).
- 506 39. Blixt, O. *et al.* Printed covalent glycan array for ligand profiling of diverse  
507 glycan binding proteins. *Proc. Natl. Acad. Sci. U. S. A.* **101**, 17033–17038  
508 (2004).
- 509 40. Arndt, N. X., Tiralongo, J., Madge, P. D., Von Itzstein, M. & Day, C. J.  
510 Differential carbohydrate binding and cell surface glycosylation of human  
511 cancer cell lines. *J. Cell. Biochem.* **112**, 2230–2240 (2011).
- 512 41. Huflejt, M. E. *et al.* Anti-carbohydrate antibodies of normal sera: Findings,

- 513 surprises and challenges. *Mol. Immunol.* **46**, 3037–3049 (2009).
- 514 42. Day, C. J. *et al.* Differential Carbohydrate Recognition by *Campylobacter jejuni*  
515 Strain 11168: Influences of Temperature and Growth Conditions. *PLoS One* **4**,  
516 e4927 (2009).
- 517 43. Cooper, O. *et al.* Functional Microarray Platform with Self-Assembled  
518 Monolayers on 3C-Silicon Carbide. *Langmuir* **36**, 13181–13192 (2020).
- 519 44. Willard, F. S. & Siderovski, D. P. Covalent immobilization of histidine-tagged  
520 proteins for surface plasmon resonance. *Anal. Biochem.* **353**, 147–149 (2006).
- 521

## 522 **Methods**

### 523 **Culture protocol for bacteria, phage and tissue culture cell lines.**

524 *Escherichia coli* strain B was used for all experiments and was grown in LB medium  
525 (10 g Tryptone, 10 g NaCl, 5 g yeast extract in 1 L of sterile dH<sub>2</sub>O) at 37°C with  
526 agitation. T4 phage, which uses *E. coli* strain B as a replicative host, was used for all  
527 experiments except T4 replication-negative 43<sup>-</sup> (DNA polymerase) and 44<sup>-</sup>  
528 (polymerase clamp holder subunit) i.e. T4 *am43/44* phage, that only uses amber-  
529 permissive host *E. coli* SupE to replicate. The cell line used was a human colon-  
530 derived tumorigenic goblet cell, HT29-MTX-E12, obtained from the European  
531 Collection of Authenticated Cell Cultures and cultured at 37°C with 5% CO<sub>2</sub> in  
532 complete media: DMEM with 10% FBS, 1× MEM non-essential amino acids and 1×  
533 penicillin-streptomycin antibiotics (ThermoFisher Scientific). Terminal cellular  
534 differentiation was induced with 10 μM N-[N-(3,5-Difluorophenacetyl)-L-alanyl]-S-  
535 phenylglycine t-butyl ester (DAPT; Sigma-Aldrich) while mucus-secretion was  
536 enhanced with 10 nM phorbol 12-myristate 13-acetate (PMA; Sigma-Aldrich).

537

538 **Fabricating the gut-on-a-chip mould and device.** A chip mould with 500 μm wide  
539 and 350 μm high channel was designed using SolidWorks® 2017 (Dassault  
540 Systèmes). The moulds were then 3D-printed and surface-salinized at Melbourne  
541 Centre for Nanofabrication (MCN), Victoria. The chips were manufactured by casting  
542 a 10:1 mixture of Sylgard™ PDMS and its curing agent respectively (Dowsil, USA),  
543 onto the moulds and were cured at 90°C until completely solidified. The chips were  
544 then removed, trimmed and their inlet and outlet ports were punched. Subsequently,  
545 the chips were washed in pentane and acetone to remove residual uncured PDMS  
546 followed by plasma bonding the chip onto a glass slide to enclose the chip channel.

547 The chip channel was ethanol (80%v/v)-sterilised, UV-sterilised and pre-treated with  
548 1:50 MaxGel™ ECM (Sigma-Aldrich). The channel was then seeded with 10 µl of  
549 HT29-MTX-E12 cells at  $3.0 \times 10^5$  cells. The seeded chip was incubated statically for  
550 16 hours to allow cell attachment. This was followed by perfusing the attached cells  
551 with complete media for 24 hours at 40 µl/hr flow rate to establish a confluent cell  
552 layer. The cell layer was then perfused with antibiotic-free media supplemented with  
553 cell-inducers DAPT and PMA, for another 24 hours at 120 µl/hr to purge residual  
554 antibiotic-containing media from the channel environment and to promote terminal  
555 cellular differentiation and mucus secretion by the cell layer. Perfusion was mediated  
556 by a 10-channel syringe pump (KD Scientific, USA).

557

558 **High temporal resolution gut-on-a-chip phage-bacteria sampling.** An in-house  
559 automated dispensing platform was constructed to aid sample collection from the gut-  
560 on-a-chip over 24 hours at 30-minute intervals. The platform consisted of conveyer  
561 belts connected to 5V motors powered by an Arduino circuit board (Arduino, Italy).  
562 Two conveyer belt systems were aligned perpendicular to each other allowing motion  
563 along the X-Y plane. A custom-made tube holder was connected to the conveyer belt  
564 system that holds the gut-on-a-chip tube over the 96-well plate to facilitate sample  
565 dispensing into wells. Time-steps for dispensing at 30-minute intervals were coded  
566 into Arduino in C++ using Arduino Integrated Development Environment (IDE). For a  
567 user-friendly interface, the code was translated onto a virtual switch board executable  
568 program using LabVIEW v.2020 (National Instruments, USA). The temporal  
569 experiment is initiated by perfusing the gut-on-a-chip with  $10^4$  colony forming units  
570 (CFU) of *E. coli* B followed by  $10^4$  PFU of T4 phages and the device was allowed to  
571 run for 24 hours under a 120 µl/hr flow rate whilst connected to the automated

572 dispensing platform to collect egressing fluid samples. In between the gut-on-a-chip  
573 and the dispensing platform, the egressing fluid was channelled through an 80°C-  
574 heated blank chip to arrest phage and bacterial replication during their egress from  
575 the gut-on-a-chip before dispensing. Phages and bacteria from the heat-inactivated  
576 samples were quantified using qPCR using SYBR Green I Master with the  
577 Lightcycler® 480 (Roche). qPCR primers and cycling protocols for *E. coli* B were as  
578 described<sup>35</sup> using 1 µl of template. T4 protocols was adapted from<sup>36</sup> using forward  
579 primer: 5'- AGGAGTTATATCAACTGTAA - 3', and reverse primer: 5'-  
580 ATCTAGGATTCTGTACTGTT - 3', with the following cycling protocol: initial  
581 denaturation at 95°C for 5 minutes; 40 cycles at 95°C for 30 seconds, 56°C for 30  
582 seconds, 72°C for 30 seconds; using 1 µl of template.

583

584 **Phage experimental evolution in gut-on-a-chip.** 10<sup>4</sup> PFU of T4 phages were  
585 perfused through the gut-on-a-chip followed by 10<sup>4</sup> CFU of *E. coli* B to supply the  
586 phages with hosts to replicate within the chip. The co-culture in each chip was  
587 maintained under a 120 µl/hr flow rate with antibiotic-free media for 24 hours.  
588 Subsequently, the mucus and the cell layer were collected via washes with 1 × DPBS  
589 and 0.25% Trypsin (ThermoFisher Scientific). The chip sample was centrifuged to  
590 obtain the bacterial cell pellet, which was resuspended in 100 µl 1 × DPBS. The  
591 supernatant containing the phages was treated with 10% chloroform to obtain a  
592 purified phage lysate. Phages and bacteria were enumerated using soft-agar overlay  
593 assay and colony spot assay, respectively. For our phage passage protocol, 10<sup>4</sup>  
594 phage PFU were taken from the purified phage (supernatant) lysate to inoculate a new  
595 gut-on-a-chip with 10<sup>4</sup> ancestral *E. coli* B CFU. We adopted this passage protocol for  
596 a total of 5 passages. In our control experimental evolution, a shaking test-tube was



597 used in place of the gut-on-a-chip within the flow set-up. The passage protocol in the  
598 control experiment was the same as the passages of the gut-on-a-chip phage  
599 experimental evolution.

600

601 **Phage DNA isolation, purification, sequencing and analyses.** To obtain sufficient  
602 DNA yield for sequencing, phages from all transfers including the ancestral phage  
603 population were amplified to high titres ( $\geq 10^9$ /ml). The phages were amplified by  
604 inoculating 30  $\mu$ l of phage lysate sample into 3 ml of *E. coli* B bacteria in exponential  
605 phase ( $OD_{600} = 0.3$ ). The inoculum was incubated for a maximum of 4 hours at 37°C  
606 with agitation to ensure that all phage genotypes have equal probability in expanding  
607 without interference from host-induced bottlenecks at late stage incubations. This was  
608 followed by 10% chloroform treatment to purify the amplified phage lysate. Phages  
609 were concentrated and ultrapurified following the phage-on-tap protocol<sup>37</sup>. 1 ml of each  
610 ultrapurified phage passage lysate was treated with 10  $\mu$ l Ambion™ DNase I  
611 (ThermoFisher Scientific) and 20  $\mu$ l RNase (Sigma-Aldrich) to eliminate bacterial  
612 genome contamination. Subsequently, the lysates underwent phage DNA extraction  
613 using Phage DNA Isolation Kit (Norgen Biotek®, Canada) as per manufacturer  
614 protocol with the following modification to maximise DNA yield: 10  $\mu$ l of 20 mg/ml  
615 Proteinase K (Sigma-Aldrich) per 1 ml of amplified phage lysate and incubated at 55°C  
616 for 1.5 hours. Phage DNA quality and concentrations were assessed via Nanodrop  
617 A<sub>260/280</sub> (ThermoFisher Scientific) readout and QuBit® Fluorometric Quantification  
618 High Sensitivity assay (ThermoFisher Scientific), respectively. Phage DNA samples  
619 were sequenced using Illumina HiSeq® 150bp paired-end chemistry (GeneWiz®,  
620 Hong Kong) and read alignments to T4 reference genome<sup>21</sup> (NCBI GenBank ID:  
621 MT984581.1) were performed via the Breseq Polymorphism Mixed Population pipeline

622 with filter settings turned off to maximise variant calling. *De novo* mutation hits were  
623 derived by comparing evolved phage population hits with ancestral background  
624 mutations using Breseq's -gdtools SUBTRACT and COMPARE commands.

625

626 **Lytic phage recombination assay.** T4  $\Delta 21\text{bp } goF$  mutant was isolated from transfer  
627 4 chip-evolved replicate 1 population by isolating phage plaques from soft-agar  
628 overlay. The phage isolates were PCR-screened and Sanger-sequenced with the  
629 flanking *goF* primers i.e. forward: 5' – GCATTAATCAGCATCAGTAC -3' and reverse:  
630 5' – AAGACGGCACAACCTTACTGG – 3', with the following PCR protocol: initial  
631 denaturation at 95°C for 10 minutes; 34 cycles at 95°C for 10 seconds, 57°C for 15  
632 seconds, 72°C for 60 seconds; and final elongation at 72°C for 5 minutes. T4 *hoc*  
633 knockout ( $\Delta hoc$ ) phage was also PCR-amplified and sequence-confirmed using the  
634 flanking *hoc* primers i.e. forward: 5' – GCTGAAACTCCTGATTGGAAATCTCACCC –  
635 3' and reverse: 5' – GCCCATAATACAGCCACTTCTTTTGCC – 3', with the following  
636 PCR protocol: initial denaturation at 95°C for 10 minutes; 34 cycles at 95°C for 30  
637 seconds, 60°C for 60 seconds, 72°C for 90 seconds; and final elongation at 72°C for  
638 10 minutes. The verified phages were amplified and chloroform-purified to high titre  
639 ( $\geq 10^9$  PFU/ml), respectively. The phages were diluted in SM buffer (5.8 g NaCl, 2.0 g  
640  $\text{MgSO}_4 \cdot 7\text{H}_2\text{O}$ , 50 ml 1 M Tris-HCl pH 7.4 in 1 L ddH<sub>2</sub>O) to obtain a 1:1 phage mix  
641 containing  $\Delta 21\text{bp } goF$  and  $\Delta hoc$  at  $1 \times 10^9$  PFU/ml. 1 ml of the mixture was reserved  
642 as an initial condition control to test for 1:1 mix accuracy. The remaining mixture was  
643 used to prepare four experimental set-ups: two replicates of MOI = 10 and two  
644 replicates at MOI = 0.1. In MOI 10, 1 ml of the  $1 \times 10^9$  PFU/ml mixture was added to  
645 1 ml of  $1 \times 10^8$  CFU/ml *E. coli* B; while in MOI 0.1, the phage mixture was diluted to  $1$   
646  $\times 10^7$  PFU/ml before adding to  $1 \times 10^8$  CFU/ml *E. coli* B. The co-cultures were then

647 incubated at 37°C with 150 rpm agitation for 30 minutes to allow a one-step T4 phage  
648 growth curve. The co-cultures were subsequently quenched with 10% chloroform. The  
649 phages in co-culture and the reserved initial condition phage mix were plated via soft-  
650 agar overlay. Single plaque cores were obtained from well-separated plaques,  
651 resuspended in 100 µl SM buffer, and PCR screened for recombinants (double  
652 mutant:  $\Delta 21\text{bp } goF + \Delta hoc$  or WT recombinant T4 genotypes) using flanking *goF*  
653 primers and internal *hoc* primers. Internal *hoc* PCR primers were, forward: 5' -  
654 ACATTATCTACGCTCCAAGC – 3' and reverse: 5' - ATCTAGGATTCTGTACTGTT -  
655 3', with the following protocol: 95°C for 10 minutes; 34 cycles at 95°C for 10 seconds,  
656 56°C for 15 seconds, 72°C for 60 seconds; and final elongation at 72°C for 5 minutes.  
657 All PCR products were loaded on 2% agarose gel, stained with SYBR™ Gold Nucleic  
658 Acid Gel Stain (ThermoFisher Scientific), for 30 minutes at 60V and subsequently, 30  
659 minutes at 50V to allow better separation between the WT and  $\Delta 21\text{bp } goF$  product.  
660 Both *goF* and *hoc* PCR products were matched to their sample of origin in the agarose  
661 gel run. The frequency of recombinants was quantified based on the *goF* PCR product  
662 size and the presence and absence of *hoc* PCR product.

663

664 **Sequencing-based phage competition assay.** Wildtype T4 phage and  
665 experimentally evolved D246N T4 mutant phage were isolated via plaque coring as  
666 previously described. The cores were resuspended in 100 µl of SM buffer and samples  
667 were PCR-amplified with flanking *hoc* primers i.e. forward: 5' –  
668 GCCCATAATACAGCCACTTCTTTTGCC – 3' and reverse: 5' –  
669 GCTGAAACTCCTGATTGGAAATCTCACCC – 3', with the following protocol: initial  
670 denaturation at 95°C for 10 minutes; 30 cycles at 95°C for 30 seconds, 60°C for 60  
671 seconds, 72°C for 90 seconds; and final elongation at 72°C for 10 minutes. The

672 verified phages were amplified and chloroform-purified to high titre ( $\geq 10^9$  PFU/ml),  
673 respectively. The amplified phages were diluted in antibiotic-free tissue culture media  
674 to obtain a 1:1 phage mix containing WT and D246N phages at  $2 \times 10^6$  PFU ( $1 \times 10^6$   
675 PFU each).  $1 \times 10^6$  PFU of the phage mix was reserved as an initial condition i.e. T =  
676 0 control. Three gut-on-a-chip replicates were each infused with  $10^6$  CFU *E. coli* B  
677 bacteria followed by  $1 \times 10^6$  PFU phage mix at 120  $\mu$ l/hr flow rate. The inoculated  
678 devices were maintained at 120  $\mu$ l/hr for 24 hours and egressing fluid samples were  
679 collected for 1 hour at the 24-hour timepoint. Fluid samples were collected in 1 ml SM  
680 buffer to rapidly dilute the collected phages and bacteria to limit further phage  
681 adsorption during sample collection. Collected samples were then amplified, DNA-  
682 extracted, sequenced and analysed as previously outlined to track the frequency of  
683 D246N mutant phage as it competes with WT T4 phage over 24 hours. Selection  
684 coefficients were calculated as described in Supplementary Table 2 based on absolute  
685 reads, obtained by multiplying read depth and coverage, of the mutation.

686

687 **Molecular cloning of recombinant Hoc protein expression strains.** Wildtype Hoc  
688 T4 phage and D246N Hoc T4 phage genomic DNA were extracted as described  
689 above. The respective *hoc* genes were PCR-amplified using primers designed with  
690 NcoI/SpeI restriction sites i.e. forward: 5' –  
691 CCTCCATGGCGATGACTTTTACAGTTGATATAAC – 3' and reverse: 5' –  
692 TTGACTAGTTATGGATAGGTATAGATGATAC – 3', with the following protocol: initial  
693 denaturation at 98°C for 5 minutes; 36 cycles at 98°C for 30 seconds, 58°C for 30  
694 seconds, 72°C for 120 seconds; and final elongation at 72°C for 5 minutes. The  
695 amplified *hoc* products were gel-extracted following manufacturer's protocol  
696 (GenElute™ Gel Extraction Kit, Sigma Aldrich). Wildtype and D246N *hoc* genes were

697 individually cloned in-frame to expression vector pPROEX-HTb, containing an N-  
698 terminal hexa-His sequence. Briefly, the amplified *hoc* product and pPROEX-HTb  
699 were digested with NcoI and SpeI (New England Biolabs) at 37°C overnight, followed  
700 by ligation at room temperature for 2 hours. The ligated expression vector was  
701 transformed into NEB 5 $\alpha$  Competent *E. coli* as per manufacturer's protocol (New  
702 England Biolabs) and plated on LB medium supplemented with 100  $\mu$ g/ml ampicillin,  
703 where colonies were PCR-screened as above mentioned. PCR-positive colonies were  
704 grown and the vector was extracted using GenElute Plasmid Miniprep Kit following  
705 manufacturer's protocol (Sigma-Aldrich). The vector was then transformed into  
706 expression strain *E. coli* BL21(DE) Star as follows. *E. coli* BL21(DE) Star was grown  
707 in LB medium to OD<sub>600</sub> 0.4 at 37°C. 5 ml of culture was centrifuged at 4°C and the  
708 pellet was washed thrice with 1 ml ice-cold 10% glycerol between centrifugations. The  
709 pellet was resuspended in 50  $\mu$ l of ice-cold 10% glycerol and added with 3  $\mu$ l of the  
710 expression vector. The mixture was transferred into a 0.1 cm electroporation cuvette  
711 (BioRad) and pulsed at 1.8 kV. Electroporated cells were recovered in 1 ml pre-  
712 warmed LB medium for 1 hour at 37°C and subsequently plated on LB medium  
713 supplemented with 100  $\mu$ g/ml ampicillin to recover Hoc expression strains.

714

715 **Recombinant Hoc protein expression, purification and modelling.** Hoc  
716 expression strains were grown in Terrific Broth (with shaking) to OD<sub>600</sub> 0.8 at 37°C.  
717 Expression was induced with 0.2 mM IPTG, incubation temperature dropped to 18°C  
718 and cells collected by centrifugation the following morning. Cell pellets were  
719 resuspended in 20 mM Tris pH8, 300 mM NaCl, 20 mM imidazole, 0.5 mM MgCl<sub>2</sub>, 1 $\times$   
720 complete EDTA-free protease inhibitor (Roche) and lysed through an Avestin

721 Emulsiflex C3 cell press. Following centrifugation at 18000 ×g the soluble fraction was  
722 applied to a 5 ml HisTrap HP column (GE Healthcare). The column was washed and  
723 protein eluted along a gradient using 20 mM Tris pH8, 400 mM NaCl, 1 M imidazole.  
724 The peak fraction (eluting at ~150 mM imidazole) was pooled and further purified over  
725 size exclusion chromatography on a HiLoad 16/600 Superdex 200 pg column (GE  
726 Healthcare) equilibrated in SEC buffer (20 mM Tris pH 8.0 and 150 mM NaCl). The  
727 Hoc proteins each eluted as a single monomeric peak and were run on reducing SDS-  
728 PAGE and verified by anti-His western (R&D Systems) (Supplementary Fig.3).  
729 Proteins were concentrated to 1 mg/ml, EDTA added to 0.5 mM final and aliquots  
730 snap-frozen in liquid nitrogen. The structural model of the T4 Hoc protein was  
731 generated using Phyre2 server<sup>38</sup> and modelled upon the crystal structure of the three  
732 N-terminal IgG domains of phage RB49 Hoc protein (PDB ID: 3SHS). The capsid  
733 binding domain could not be accurately modelled due to a lack of solved structural  
734 homologues.

735

736 **Glycan array printing.** Glycan arrays consisting of 150 diverse glycans (DextraLabs)  
737 in the absence of spacers were taken from existing glycan libraries<sup>39–41</sup>. Glycans were  
738 amine functionalized as previously described<sup>42</sup> and subsequently printed as  
739 described<sup>43</sup>. Briefly, glycosylamines were suspended in 1:1 dimethylformamide (DMF)  
740 : dimethyl sulfoxide (DMSO) at a concentration of 500 μM and printed onto  
741 SuperEpoxy3 glass slides (ArrayIt) using a SpotBot Extreme array spotter (ArrayIT) in  
742 a six-pin subarray print per glass slide format. All glycans were printed in replicates of  
743 four, including four AlexaFlour 555/647 and FITC control spots, per subarray using  
744 946MP4 pins and a contact time of 1 second at 50% relative humidity, with pins being  
745 reloaded after every 8 spots. DMF : DMSO was also printed as blanks controls. The

746 printed arrays were subsequently acetylated in 25% (v/v) acetic anhydride in methanol  
747 at 4°C for 15 min, and then neutralized in 1:1 ethanolamine : DMF. Finally, glycan  
748 arrays were washed with 100% ethanol and dried in an empty 50 mL tube by  
749 centrifugation for 5 min at 200 ×g. Glycan arrays were vacuum sealed and stored at  
750 4°C.

751

752 **T4 phage labelling and glycan array hybridization.** To label T4 phages (wildtype  
753 [WT], D246N Hoc or  $\Delta hoc$ ), stocks were diluted to  $10^8$  phages/mL in SM buffer and  
754 allowed to incubate with SYBR green dye (1:1000) (Molecular Probes) in the dark at  
755 4°C for 1 hour. Excess dye was removed by three consecutive washes with 1 mL of  
756 SM buffer using an Amicon ultrafiltration tube (100 kDa). A buffer-exchange through  
757 three consecutive washes with 1 mL of array phosphate buffered saline (PBS) (50 mM  
758 PBS, 1.8 mM MgCl<sub>2</sub> and 1.8 mM CaCl<sub>2</sub>, pH 7.4) was similarly performed using Amicon  
759 ultrafiltration tubes (100 kDa) (Merck). SYBR-labelled phages were prepared fresh  
760 daily and immediately applied to glycan arrays after buffer-exchange. Before  
761 hybridizations, glycan array slides were blocked in 0.5% BSA in array PBS for 5 min  
762 at room-temperature (RT). After washing with array PBS, slides were dried through  
763 centrifugation and a Gene Frame (1.7 × 2.8 cm, 125 µL, Abgene) was used to isolate  
764 the arrays prior to the addition of the labelled phage.  $10^8$  of either SYBR labelled WT,  
765 D246N Hoc or  $\Delta hoc$  T4 phages were applied to individual glycan arrays as a 1 mL  
766 bubble and allowed to hybridize at RT for 1 hour in the dark. In the final 5 minutes of  
767 incubation, phages were fixed through the addition of formaldehyde into the same  
768 bubble (final concentration 4%). Following hybridization, glycans arrays were gently  
769 washed three times for 5 min in array PBS and finally dried through centrifugation.

770

771 **WT and D246N Hoc protein labelling and glycan array hybridization.** Labelling of  
772 recombinant WT and D246N Hoc proteins was performed using their respective hexa-  
773 His-tags. Here, 1  $\mu\text{g}$  of each protein was incubated at a molar ratio of 1:2:4 with anti-  
774 His-tag mouse monoclonal antibody (Cell Signalling Technology), anti-mouse-IgG-  
775 Alexa647 conjugated rabbit polyclonal antibody (Life Technologies) and goat  
776 conjugated anti-rabbit-IgG-Alexa647 polyclonal antibody (Life Technologies) in 1 mL  
777 Array PBS. This complex was allowed to hybridize in the dark at 4°C for 15 min. As  
778 described previously, gene frames were used to isolate glycan arrays, and Alexa647  
779 labelled recombinant Hoc proteins were applied as a bubble for 1 hour at RT and  
780 allowed to hybridize. Glycan arrays were subsequently washed for three times for 5  
781 min in array PBS, and dried through centrifugation.

782

783 **Fluorescent image acquisition and data processing.** Fluorescence intensities of  
784 the array spots were measured with the Innoscan 1100AL (Innopsys) scanner using  
785 either the 488 nm (SYBR) or 635 nm (A647) laser excitation wavelength depending  
786 on the sample. The Image analysis was carried out using the inbuilt imaging software,  
787 MAPIX (Innopsys). Raw glycan signals were exported into Microsoft Excel 2016. The  
788 mean background was calculated from the average of DMF/DMSO blanks on the array  
789 plus three standard deviations. This was subtracted from each glycan to generate an  
790 adjusted signal. A one tailed t-test was performed with significance set at  $p = 0.05$ .  
791 Binding events confirmed across 3 arrays were compiled as heatmaps representing  
792 T-test and fold increases above background.

793



794 **Surface plasmon resonance detection.** Surface plasmon resonance (SPR)  
795 experiments to confirm glycan hits and elucidate differences in binding affinity between  
796 the WT and D246N Hoc proteins were performed using a Pioneer FE SPR system  
797 (Pioneer). WT and D246N Hoc proteins were loaded onto channels 1 and 2 of a  
798 HisCap biosensor (Satorious) and channel 3 was blank immobilized to enable  
799 reference subtraction in PBS. A minimum of 5000 relative units (RU) of either Hoc  
800 protein was immobilized using the nitrilotriacetic acid (NTA)-Nickel capture system  
801 modified from reference<sup>44</sup>. Here, the hexa-His-tag allows capture of the Hoc proteins  
802 in the correct orientation and subsequent covalent crosslinking prevents protein from  
803 dissociating over the course of the SPR run. In brief, nickel was bound to the HisCap  
804 biosensor using NiSO<sub>4</sub> in running buffer. The carboxymethylated dextran (CMD)  
805 surface was then activated using N-hydroxysuccinimide (NHS)/1-ethyl-3-(3-  
806 dimethylaminopropyl)-carbodiimide hydrochloride (EDC). Each protein was  
807 subsequently immobilized at flow rate of 10  $\mu$ L/min for 10 min. Uncoupled amine  
808 reactive sites of the CMD were blocked through an injection of ethanolamine and  
809 finally 0.35 M EDTA was injected to remove any poorly associated protein. A maximum  
810 concentration of 100  $\mu$ M of selected glycans was tested using a OneStep analysis  
811 programmed using the Pioneer instrument. OneStep was performed with 75% loop  
812 volume and a 3% sucrose control. Glycans were flowed at 40  $\mu$ L/min with a  
813 dissociation time of 180s (Supplementary Fig.5). Subsequent regeneration of the  
814 surface was performed with TE buffer for 60s at 50  $\mu$ L/min and 60s dissociation.  
815 Blanks were run periodically every 2 cycles. Analysis of SPR sensorgrams to  
816 determine glycan dissociation constants ( $K_D$ ) was performed separately with the Qdat  
817 analysis software package (Biologic Software, Campbell, Australia). All analyses were  
818 performed on two independently prepared HisCap chips with each protein loaded

819 twice and glycans tested in duplicate per run. SPR responses less than 5 RU were  
820 deemed insignificant and attributed to non-specific interaction of the glycan with the  
821 positively charged HisCap chip surface.

822

823 **Phage retention and washout assay.** A 1:1 phage mix consisting of D246N Hoc T4  
824 phage and a WT T4 Hoc phage (~~am43/44~~) was prepared in antibiotic-free tissue  
825 culture media at 1 mM final glycan concentration of glycans  $\alpha$ -1,6-mannobiose  
826 (DextraLabs) or Lacto-N-fucopentaose I (DextraLabs). The 1:1 phage ratio was  
827 verified by plating on *E. coli* SupE and *E. coli* B lawns in triplicates where, the amber  
828 phage only plaques on an amber mutant permissive host, *E. coli* SupE while D246N  
829 Hoc phage plaques on both *E. coli* SupE and *E. coli* B. Hence, we were able to quantify  
830 the D246N Hoc phage (on *E. coli* B) and the amber mutant phage via subtraction (total  
831 plaques from *E. coli* SupE – total plaques from *E. coli* B). Three replicate gut-on-a-  
832 chips were infused with  $1 \times 10^7$  PFU/ml of 1:1 phage-glycan mix for 1 hour at 120  $\mu$ l/hr.  
833 After which, the devices were perfused with sterile antibiotic-free tissue culture media  
834 supplemented with 1 mM of the appropriate glycan for 4 hours. Device effluents were  
835 collected in equal volumes of SM buffer every 15 minutes for the first hour and every  
836 30 minutes for the subsequent hours. The phage timepoints were quantified by spot-  
837 plating the device effluents on both *E. coli* B and *E. coli* SupE lawns to assess for  
838 phage washout.
